# Supplementary material for: Identification of N-Oxide-Containing Aromatic Heterocycles as Pharmacophores for Rumen Fermentation Modifiers
Source: MDPI journal article supplement (doi:10.3390/metabo9040062), 2019-04-02
Supplement: s1 [file s1]

# **Identification of *N*-oxide-containing aromatic heterocycles as pharmacophores for rumen fermentation modifiers**

Carla Bonifacino, Gonzalo Rodríguez, Analía Pérez-Ruchel, José Luis Repetto, Hugo Cerecetto, Cecilia Cajarville and Mercedes González

- <sup>1</sup> Grupo de Química Medicinal, Laboratorio de Química Orgánica Medicinal, Instituto de Química Biológica, Facultad de Ciencias, Universidad de la República, Iguá 4225, 11400 Montevideo, Uruguay
  - <sup>2</sup> Departamento de Nutrición, Instituto de Producción Animal, Facultad de Veterinaria, Universidad de la República, Ruta 1 km 42,500, San José, Uruguay
  - <sup>3</sup> Área de Radiofarmacia, Centro de Investigaciones Nucleares, Facultad de Ciencias, Universidad de la República, Mataojo 2055, 11400 Montevideo, Uruguay
  - <sup>4</sup> Departamento de Bovinos, Instituto de Producción Animal, Facultad de Veterinaria, Universidad de la República, Ruta 1 km 42,500, San José, Uruguay
- \* Correspondence: ccajarville@gmail.com; Tel.: +598-43407011

| Treatment\time       | pH          |             |             |             |             |
|----------------------|-------------|-------------|-------------|-------------|-------------|
|                      | 0 h         | 4 h         | 6 h         | 12 h        | 96 h        |
| <b>without (UIR)</b> | 7.27 ± 0.01 | 6.56 ± 0.03 | 6.53 ± 0.02 | 6.65 ± 0.01 | 6.14 ± 0.02 |
| <b>Mon</b>           | 7.20 ± 0.01 | 6.59 ± 0.01 | 6.58 ± 0.02 | 6.58 ± 0.01 | 6.13 ± 0.02 |
| <b>1</b>             | 7.22 ± 0.02 | 6.61 ± 0.01 | 6.54 ± 0.01 | 6.63 ± 0.01 | 6.15 ± 0.02 |
| <b>2</b>             | 7.13 ± 0.01 | 6.56 ± 0.01 | 6.53 ± 0.01 | 6.63 ± 0.01 | 6.14 ± 0.01 |
| <b>3</b>             | 7.00 ± 0.02 | 6.63 ± 0.01 | 6.69 ± 0.01 | 6.34 ± 0.01 | 6.10 ± 0.02 |
| <b>4</b>             | 6.99 ± 0.01 | 6.61 ± 0.01 | 6.53 ± 0.01 | 6.33 ± 0.02 | 6.08 ± 0.01 |
| <b>5</b>             | 7.04 ± 0.01 | 6.62 ± 0.02 | 6.53 ± 0.01 | 6.56 ± 0.02 | 6.07 ± 0.02 |
| <b>6</b>             | 7.04 ± 0.01 | 6.62 ± 0.01 | 6.51 ± 0.02 | 6.56 ± 0.02 | 6.11 ± 0.01 |
| <b>7</b>             | 7.06 ± 0.01 | 6.62 ± 0.01 | 6.55 ± 0.02 | 6.58 ± 0.02 | 6.11 ± 0.01 |
| <b>8</b>             | 7.06 ± 0.02 | 6.61 ± 0.01 | 6.53 ± 0.02 | 6.57 ± 0.01 | 6.08 ± 0.02 |
| <b>9</b>             | 7.05 ± 0.01 | 6.59 ± 0.01 | 6.53 ± 0.02 | 6.57 ± 0.02 | 6.09 ± 0.01 |
| <b>10</b>            | 7.07 ± 0.02 | 6.64 ± 0.01 | 6.53 ± 0.02 | 6.56 ± 0.03 | 6.08 ± 0.01 |
| <b>11</b>            | 7.05 ± 0.01 | 6.64 ± 0.01 | 6.54 ± 0.01 | 6.59 ± 0.01 | 6.10 ± 0.01 |
| <b>12</b>            | 7.10 ± 0.01 | 6.69 ± 0.01 | 6.56 ± 0.01 | 6.62 ± 0.01 | 6.06 ± 0.02 |
| <b>13</b>            | 7.08 ± 0.01 | 6.57 ± 0.01 | 6.55 ± 0.02 | 6.61 ± 0.01 | 6.10 ± 0.02 |
| <b>14</b>            | 7.07 ± 0.02 | 6.60 ± 0.01 | 6.54 ± 0.01 | 6.55 ± 0.01 | 6.06 ± 0.01 |
| <b>15</b>            | 7.01 ± 0.02 | 6.63 ± 0.01 | 6.51 ± 0.02 | 6.56 ± 0.01 | 6.08 ± 0.01 |
| <b>16</b>            | 7.13 ± 0.01 | 6.58 ± 0.01 | 6.55 ± 0.01 | 6.74 ± 0.01 | 6.06 ± 0.02 |
| <b>17</b>            | 7.01 ± 0.02 | 6.60 ± 0.01 | 6.50 ± 0.02 | 6.54 ± 0.01 | 6.13 ± 0.01 |
| <b>18</b>            | 7.00 ± 0.02 | 6.58 ± 0.01 | 6.52 ± 0.01 | 6.54 ± 0.01 | 6.14 ± 0.01 |
| <b>19</b>            | 7.04 ± 0.01 | 6.59 ± 0.01 | 6.51 ± 0.02 | 6.54 ± 0.01 | 6.41 ± 0.01 |
| <b>20</b>            | 7.12 ± 0.01 | 6.59 ± 0.02 | 6.51 ± 0.02 | 6.54 ± 0.01 | 6.11 ± 0.01 |

**Table S1.** Values of pH, during time, in the different rumen-treatments. In green are highlighted some relevant time-points (see text).

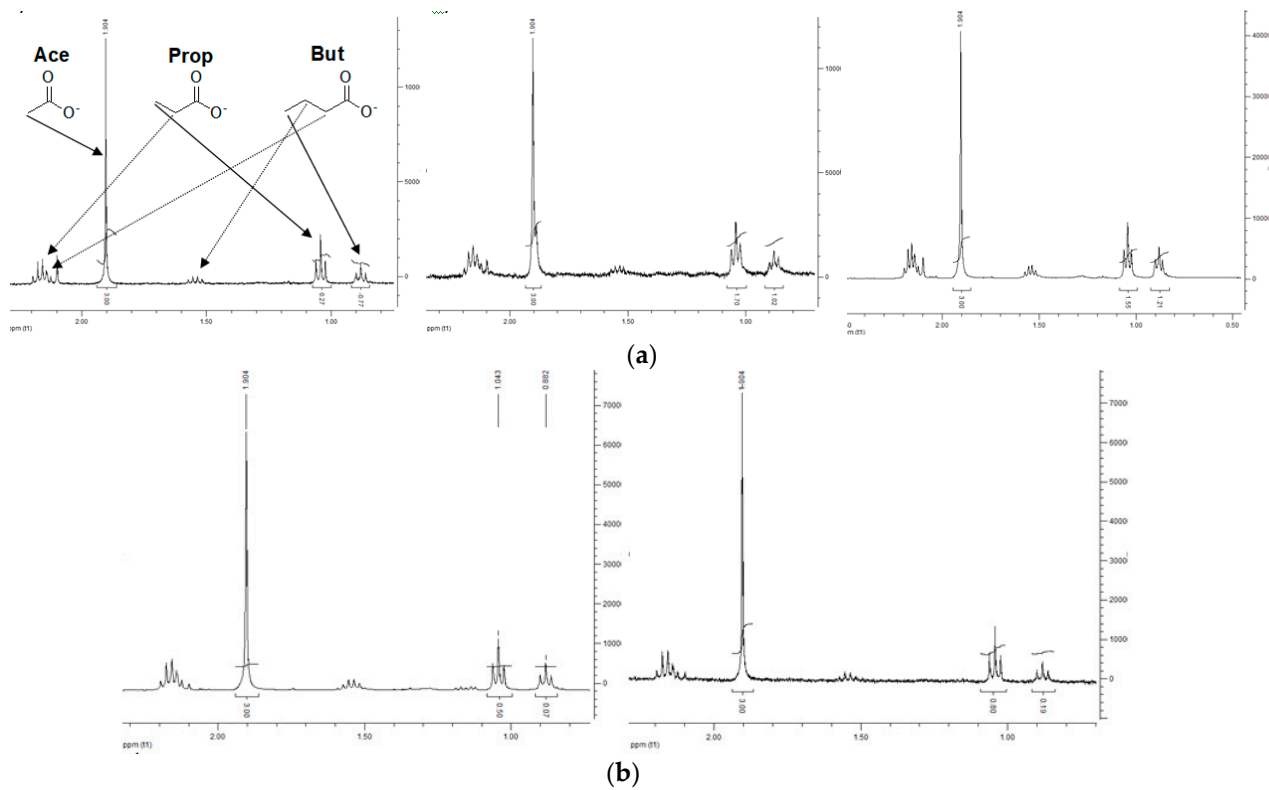

**Figure S1.** The selected region of the whole-rumen  $^1\text{H}$  NMR without (**a**, left,  $t=96$  h; **b**, left,  $t=12$  h) and with treatment (**a**, center, Mon,  $t=96$  h; **a**, right, furoxan **19**,  $t=96$  h; **b**, left, quinoxaline dioxide **3**,  $t=12$  h). The structures of SCFA are shown as a guide (**a**, left); the signals used for quantifications are marked with full arrows, and those used for identifications are marked with dotted arrows.

|                                                                |   |            |        |        |        |         |         |         |         |         |         |
|----------------------------------------------------------------|---|------------|--------|--------|--------|---------|---------|---------|---------|---------|---------|
|                                                                |   | replicates |        |        |        |         |         |         |         |         |         |
| run 1                                                          | 1 | 1          | 1      | 1      | 1      | 1       | 1       | 1       | 1       |         |         |
|                                                                | 2 | 2          | 2      | 2      | 2      | 2       | 2       | 2       | 2       |         |         |
|                                                                | 3 | 3          | 3      | 3      | 3      | 3       | 3       | 3       | 3       |         |         |
|                                                                |   | t= 0 h     | t= 4 h | t= 6 h | t= 8 h | t= 12 h | t= 24 h | t= 48 h | t= 72 h | t= 96 h |         |
| Produced gas is measured of replicates 1-3                     |   |            |        |        |        |         |         |         |         |         |         |
|                                                                |   | 4          | 4      | 4      | 4      | 4       | 4       | 4       | 4       | 4       |         |
|                                                                |   | 5          | 5      | 5      | 5      | 5       | 5       | 5       | 5       | 5       |         |
|                                                                |   | t= 0 h     | t= 4 h | t= 6 h |        |         |         | t= 12 h |         |         | t= 96 h |
| Aliquots of each replicate (4 and 5) are taken to measure pH   |   |            |        |        |        |         |         |         |         |         |         |
| Aliquots of each replicate are taken (4 and 5) to measure SCFA |   |            |        |        |        |         |         |         |         |         |         |
|                                                                |   | replicates |        |        |        |         |         |         |         |         |         |
| run 2                                                          | 1 | 1          | 1      | 1      | 1      | 1       | 1       | 1       | 1       |         |         |
|                                                                | 2 | 2          | 2      | 2      | 2      | 2       | 2       | 2       | 2       |         |         |
|                                                                | 3 | 3          | 3      | 3      | 3      | 3       | 3       | 3       | 3       |         |         |
|                                                                |   | t= 0 h     | t= 4 h | t= 6 h | t= 8 h | t= 12 h | t= 24 h | t= 48 h | t= 72 h | t= 96 h |         |
| Produced gas is measured of replicates 1-3                     |   |            |        |        |        |         |         |         |         |         |         |
|                                                                |   | 4          | 4      | 4      | 4      | 4       | 4       | 4       | 4       | 4       |         |
|                                                                |   | 5          | 5      | 5      | 5      | 5       | 5       | 5       | 5       | 5       |         |
|                                                                |   | t= 0 h     | t= 4 h | t= 6 h |        |         |         | t= 12 h |         |         | t= 96 h |
| Aliquots of each replicate (4 and 5) are taken to measure pH   |   |            |        |        |        |         |         |         |         |         |         |
| Aliquots of each replicate are taken (4 and 5) to measure SCFA |   |            |        |        |        |         |         |         |         |         |         |

**Figure S2.** Schematic experimental protocol. This protocol was applied for compounds **1-20**, Mon, and untreated incubated rumen (UIR). The dose-response (gas production) studies were performed similarly (run 1-2 and replicates 1-3) for *N*-oxides **3**, **9**, and **19**, compound **20**, Mon, and UIR.
